# Supplementary material
Source: publisher site journal article supplement (https://www.dovepress.com/article/113591)
Supplement: Supplementary file 1 [file get_supplementary_file.php]

Appendix 1. Example Pre-operative Health Screening Questionnaire

|                                                                                                          |                                                                                           |                        |
|----------------------------------------------------------------------------------------------------------|-------------------------------------------------------------------------------------------|------------------------|
| <p><b>Pre-operative Questionnaire</b></p> <p>Day Stay Patient<br/>Royal Aberdeen Children's Hospital</p> | <p>NAME:<br/>Hospital Number:<br/>CHI number:<br/>Date of Birth:<br/>Age:<br/>Gender:</p> | <p>AFFIX<br/>LABEL</p> |
|----------------------------------------------------------------------------------------------------------|-------------------------------------------------------------------------------------------|------------------------|

| To be completed by the Parent/Guardian                                       |                           |
|------------------------------------------------------------------------------|---------------------------|
| Date                                                                         |                           |
| Name of person completing this form                                          |                           |
| What is your relationship to the child?                                      |                           |
| What is your mobile phone number?                                            |                           |
| Name and telephone number of person with parental responsibility             | As above /                |
| What procedure is your child getting today?                                  |                           |
| Why are they getting this procedure?                                         |                           |
| Is this to be done under general anaesthesia?                                | Yes / No / Not sure       |
| What time did your child last eat?                                           |                           |
| What time did your child last drink?                                         |                           |
| What did they drink?                                                         |                           |
| Please write down any ALLERGIES your child has and what happens?             |                           |
| Please write down any health problems or illnesses your child has.           |                           |
| Has your child had a cough, cold or chest infection during the last 2 weeks? | Yes / No                  |
| Has your child had any diarrhoea, vomiting or fever in the last 48 hours?    | Yes / No                  |
| Does your child have any bleeding problems?                                  | Yes / No                  |
| Does your child take any regular medicines?                                  | Yes / No                  |
| Please write down any regular medicines that your child takes.               |                           |
| Have they taken their medicines today?                                       | Yes / No / Not applicable |

|                                                                                                                                         |                           |
|-----------------------------------------------------------------------------------------------------------------------------------------|---------------------------|
| Has your child ever had an operation or procedure under general anaesthesia?<br>If yes, please write down the operations or procedures. | Yes / No                  |
| Has your child ever had any problems with general anaesthesia?<br>If yes, please write down the problems.                               | Yes / No / Not applicable |
| Has your child ever needed medicine to calm them down before anaesthesia?                                                               | Yes / No / Not applicable |
| Have any family members had a significant reaction to general anaesthesia?<br>If yes, what reaction did they have?                      | Yes / No                  |
| Are your child's immunisations up to date?                                                                                              | Yes / No                  |
| If applicable, when was your child's last menstrual period?                                                                             | Not applicable /          |
| Please write down the name of your child's GP and the GP practice.                                                                      |                           |
| Please write down the name of your child's health visitor / school.                                                                     |                           |
| Please write down your child's religion.                                                                                                |                           |
| Please write down any other special requirements your child has.                                                                        |                           |
| Do you have enough paracetamol at home?                                                                                                 | Yes (4-6 doses) / No      |
| Do you have enough ibuprofen at home?                                                                                                   | Yes (4-6 doses) / No      |
| Thank-you for completing this questionnaire.<br>Please give this to the nurse looking after your child on the ward.                     |                           |

|                                                                                                          |
|----------------------------------------------------------------------------------------------------------|
| <b>To be completed by the Ward Nurse</b>                                                                 |
| <input type="checkbox"/> I have reviewed the above questionnaire. No issues have been identified.        |
| <input type="checkbox"/> I have notified _____ (anaesthetic team)<br>of the following issues:            |
| <input type="checkbox"/> I have notified _____ (surgical/dental team)<br>of the following issues:        |
| <input type="checkbox"/> I have notified _____ (specialist nurse) to review this child.                  |
| <input type="checkbox"/> I have asked the play specialist to review this child.                          |
| <input type="checkbox"/> I have shown the following pain scales to this child: <b>FACES / Pain Ruler</b> |
| I have applied EMLA/Ametop at (time):                                                                    |
| Ward Nurse: ..... Signature: ..... Designation: .....                                                    |
